# Supplementary material for: Neglected Case of Human Balantidiasis: Presumed as Antibiotic-Associated Diarrhoea
Source: Hindawi journal article supplement (doi:10.1155/2022/6013151), 2022-06-13

## सुचित मन्जुरीनामा

अनुसन्धानको शीर्षक : Neglected case of human balantidiasis; presumed as antibiotic-associated diarrhoea \*

सहभागीको नाम

A

उमेर 26 निर पुर्ख

मलाई यस अध्ययनको बारेमा हेरेर कुराको अवगत मैले बुझ्ने भाषामा गराइएको छ । मैले यसै कुरा बुझ्नेछु र मलाई विशेष कुरा बुझ्ने मौका पनि दिइएको छ । मेरो सहभागीना स्वच्छिद्र हो अनिकुनै पनि समयमा कुनै पनि कारण नबनाइ यस अध्ययनबाट फाइदाको लागि स्वतन्त्र छु । साथै यसले गर्दा मेरो शिर्षकमाथि हेरचाह वा वैधानिक अधिकार माथि कुनै प्रभाव पर्ने छैन भनी मलाई राखी धाहा छ ।

म आफूला फोटो तथा भिडियो, परिचयपत्र बुझ्ने शर्तमा दिन मन्जुर छु । मैले दिएको जानकारी मेडिकल रेकर्ड वा मेडिकल जर्नलमा प्रकाशन हुन सक्ने कुरा बुझ्नेछु । यहाँ दिएको मन्जुरीनामामा मैले नै हस्ताक्षर गरेको हो ।

मैले दिएको जानकारीहरू गोप्य रहने र उचित तथा अनुसन्धानका लागि मात्र प्रयोग हुने जानकारी गराइएको छ । म आफूला दुवै र स्वविवेकले नै यस अध्ययनमा सहभागी भएको छु ।

यस सहमति फारममा हस्ताक्षर गर्दा म कुनै लागूजोषीको प्रभावमा नभएको कुरा स्पष्ट छ ।

सहभागीको सही *Arjun*

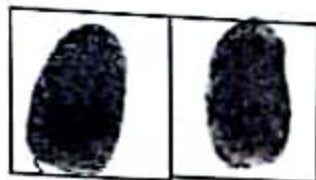

Supplement: f1 [file 6013151.f1.zip]
